# Supplementary material
Source: PubMed Central journal article supplement (PMC7273536)
Supplement: mmc1.pdf [file mmc1.pdf]

**Supplemental Data**

***De Novo* SOX6 Variants Cause a Neurodevelopmental  
Syndrome Associated with ADHD, Craniosynostosis,  
and Osteochondromas**

Dara Tolchin, Jessica P. Yeager, Priya Prasad, Naghmeh Dorrani, Alvaro Serrano Russi, Julian A. Martinez-Agosto, Abdul Haseeb, Marco Angelozzi, G.W.E. Santen, Claudia Ruivenkamp, Saadet Mercimek-Andrews, Christel Depienne, Alma Kuechler, Barbara Mikat, Hermann-Josef Ludecke, Frederic Bilan, Gwenael Le Guyader, Brigitte Gilbert-Dussardier, Boris Keren, Solveig Heide, Damien Haye, Hilde Van Esch, Liesbeth Keldermans, Damara Ortiz, Emily Lancaster, Ian D. Krantz, Bryan L. Krock, Kieran B. Pechter, Alexandre Arkader, Livija Medne, Elizabeth T. DeChene, Eduardo Calpena, Giada Melistaccio, Andrew O.M. Wilkie, Mohnish Suri, Nicola Foulds, Genomics England Research Consortium, Amber Begtrup, Lindsay B. Henderson, Cara Forster, Patrick Reed, Marie T. McDonald, Allyn McConkie-Rosell, Julien Thevenon, Pauline Le Tanno, Charles Coutton, Anne C.H. Tsai, Sarah Stewart, Ales Maver, Rudolf Gorazd, Olivier Pichon, Mathilde Nizon, Benjamin Cogné, Bertrand Isidor, Dominique Martin-Coignard, Radka Stoeva, Véronique Lefebvre, and Cédric Le Caignec

## **SUPPLEMENTAL MATERIALS**

### **Supplemental Tables**

| <b>Subject Numbers</b> | <b>Internal IDs</b> | <b>Referring Centers</b> | <b>Methods of diagnostic</b>                        |
|------------------------|---------------------|--------------------------|-----------------------------------------------------|
| #1                     | PIT-1               | Pittsburgh               | Agilent 180K Human Genome CGH + SNP ISCA            |
| #2                     | PIT-2               | Pittsburgh               | Agilent 180K Human Genome CGH + SNP ISCA            |
| #3                     | PIT-3               | Pittsburgh               | Agilent 180K Human Genome CGH + SNP ISCA            |
| #4                     | CHUN-1              | Nantes                   | Agilent 60K ISCA v.2                                |
| #5                     | CHLM-1              | Le Mans                  | Agilent 60K ISCA v.2                                |
| #6                     | LJU-1               | Ljubljana                | Agilent 180K                                        |
| #7                     | IHG-1               | Essen                    | Affy CytoScan HD                                    |
| #8                     | CHUP-1              | Poitiers                 | Agilent 105K                                        |
| #9                     | UK-1                | Nottingham               | WGS (Genomics England 100,000 Genomes Project)      |
| #10                    | UK-2                | Nottingham               | WGS (Genomics England 100,000 Genomes Project)      |
| #11                    | CHUN-2              | Nantes                   | WES; Agilent SureSelect Human All Exome 50 Mb Kit   |
| #12                    | GDX-3               | Sickkids                 | WES; Agilent SureSelect Clinical Research Exome Kit |
| #13                    | GDX-1               | UCLA                     | WES; Agilent SureSelect Clinical Research Exome Kit |
| #14                    | GDX-2               | Duke                     | WES; Agilent SureSelect Clinical Research Exome Kit |
| #15                    | PS-1                | Pitié                    | WES; Medexome Nimblegen 47 Mb Kit                   |
| #16                    | CHOP-1              | Philadelphia             | WES; Agilent SureSelectXT Clinical Exome version 1  |
| #17                    | LEUV-1              | Leuven                   | WES; Medexome Nimblegen, custom EZ choice XL V4     |
| #18                    | LEID-1              | Leiden                   | WES; Agilent SureSelect V5                          |
| #19                    | CHUG-1              | Grenoble                 | WGS                                                 |

**Table S1. Referring Centers and Methods of Diagnostic for the 19 Affected Individuals.**

| Protein | Reference sequence |
|---------|--------------------|
| SRY     | CAA37790.1         |
| SOX1    | NP_005977.2        |
| SOX2    | NP_003097.1        |
| SOX3    | NP_005625.2        |
| SOX4    | AAH72668.1         |
| SOX5    | AAH60773.1         |
| SOX6    | AAK26115.1         |
| SOX7    | CAC84226.1         |
| SOX8    | NP_055402.2        |
| SOX9    | CAA86598.1         |
| SOX10   | CAG38808.1         |
| SOX11   | BAA88122.1         |
| SOX12   | AAH67361.1         |
| SOX13   | AAD50120.1         |
| SOX14   | AAC95380.1         |
| SOX15   | AAH72003.1         |
| SOX17   | BAB83867.1         |
| SOX18   | BAA94874.1         |
| SOX21   | AAC95381.1         |
| SOX30   | BAA37146.1         |

**Table S2. Accession Numbers for the Human SOX Sequences Aligned in Figure 4.**

| Vertebrate species  | Scientific name                 | Reference sequence |
|---------------------|---------------------------------|--------------------|
| Human               | <i>Homo sapiens</i>             | NM_033326.3        |
| Mouse               | <i>Mus musculus</i>             | AAC52263.1         |
| Dog                 | <i>Canis lupus familiaris</i>   | XP_022263597.1     |
| Cow                 | <i>Bos taurus</i>               | NP_001178347.1     |
| Armadillo           | <i>Dasypus novemcinctus</i>     | XP_023438566.1     |
| Platypus            | <i>Ornithorhynchus anatinus</i> | XP_028916408.1     |
| Chicken             | <i>Gallus gallus</i>            | NP_001305380.1     |
| Western clawed frog | <i>Xenopus tropicalis</i>       | XP_017945061.1     |
| Zebrafish           | <i>Danio rerio</i>              | NP_001116481.1     |

**Table S3. Accession numbers of SOX6 ortholog sequences aligned in Figure S1.**

| Variant     | Forward primer                          | Reverse primer                            |
|-------------|-----------------------------------------|-------------------------------------------|
| WT          | CAAAGATT <b>TGG</b> AAGGAAAAAATGGA      | TTTCCTT <b>CCA</b> ATCTTTTCAAAGTAG        |
| p.Trp161Cys | CAAAGATT <b>TGC</b> AAGGAAAAAATGGA      | TTTCCTT <b>GCA</b> ATCTTTTCAAAGTAG        |
| WT          | CGACCA <b>ATG</b> AATGCGTTCATGGTTTG     | CGCATT <b>CAT</b> TGGTCGCTTGATGTGG        |
| p.Met605Thr | CGACCA <b>ACG</b> AATGCGTTCATGGTTTG     | CGCATT <b>CGT</b> TGGTCGCTTGATGTGG        |
| WT          | AGGATCTCGCT <b>TGG</b> AAATCCATGTCCAACC | ATGGATTT <b>CCAG</b> GCGAGATCCTAAGATTTTGC |
| p.Trp639Arg | AGGATCTCGC <b>CGG</b> AAATCCATGTCCAACC  | ATGGATTT <b>CCG</b> GCGAGATCCTAAGATTTTGC  |
| WT          | GCACCT <b>TCT</b> GCCAGCCCCGAGCCCA      | GGCTGGC <b>AGA</b> GGTGCTAGAGCAGT         |
| p.Ser746Leu | GCACCT <b>TTG</b> GCCAGCCCCGAGCCCA      | GGCTGGC <b>CAA</b> GGTGCTAGAGCAGT         |

**Table S4. Primers Used to Generate Expression Plasmids for SOX6 Variants.** Wild-type (WT) sequences are shown as references. Codons affected by variants are in bold font and underlined.

| Affected individual | Body part | Region of the body part exhibiting endochondroma(s)                                                                                                     |
|---------------------|-----------|---------------------------------------------------------------------------------------------------------------------------------------------------------|
| <b>PIT-1</b>        | right arm | 5 <sup>th</sup> proximal phalanx<br>distal 4 <sup>th</sup> middle phalanx<br>distal metaphysis of the 3 <sup>rd</sup> metacarpal bone<br>trapezoid bone |
|                     | left arm  | proximal humerus<br>distal 4 <sup>th</sup> metacarpal bone metaphysis<br>proximal end of 1 <sup>st</sup> metacarpal bone                                |
|                     | left leg  | proximal end of 1 <sup>st</sup> metatarsal bone                                                                                                         |
|                     | spine     | right 12 <sup>th</sup> vertebral body (transverse process)                                                                                              |
| <b>PIT-2</b>        | right leg | distal femur metaphysis                                                                                                                                 |
|                     | left leg  | proximal fibula<br>proximal phalanx of 4 <sup>th</sup> toe                                                                                              |
| <b>CHOP-1</b>       | right arm | proximal humerus*                                                                                                                                       |
|                     | left arm  | proximal humerus                                                                                                                                        |
|                     | right leg | distal femur**                                                                                                                                          |
|                     | left leg  | distal tibia                                                                                                                                            |
|                     | thorax    | right rib*                                                                                                                                              |

**Table S5. List of Endochondromas Found in Affected Individuals.** \*Osteochondromas no longer palpable, but still visible on X-rays two years later. \*\*Osteochondromas no longer palpable and no longer visible on X-rays two years later.

| <b>Subject number</b> | <b>Internal identifier</b> | <b>Genomic variant (NM_033326.3)</b> | <b>Telomeric boundary</b> | <b>Centromeric boundary</b> | <b>Size of the deletion</b> |
|-----------------------|----------------------------|--------------------------------------|---------------------------|-----------------------------|-----------------------------|
| #1                    | PIT-1                      | del ex. 1 to 2                       | 16,358,927                | 16,497,834                  | 138,907 bp                  |
| #2                    | PIT-2                      | del ex. 1 to 2                       | 16,358,927                | 16,497,834                  | 138,907 bp                  |
| #3                    | PIT-3                      | del ex. 1 to 2                       | 16,358,927                | 16,497,834                  | 138,907 bp                  |
| #4                    | CHUN-1                     | del ex. 1 to 4                       | 16,238,166                | 16,554,120                  | 315,954 bp                  |
| #5                    | CHLM-1                     | del ex. 2 to 3                       | 16,309,520                | 16,419,313                  | 109,793 bp                  |
| #6                    | LJU-1                      | del ex. 2 to 13                      | 16,023,626                | 16,446,051                  | 422,425 bp                  |
| #7                    | IHG-1                      | del ex. 2 to 12                      | 16,049,440                | 16,399,572                  | 350,132 bp                  |
| #8                    | CHUP-1                     | del ex. 5 to 7                       | 16,128,647                | 16,239,865                  | 111,218 bp                  |

**Table S6. Location, Boundaries and Size of the SNVs Affecting *SOX6* in Eight Study Subjects (hg19).**

# Supplemental Figures

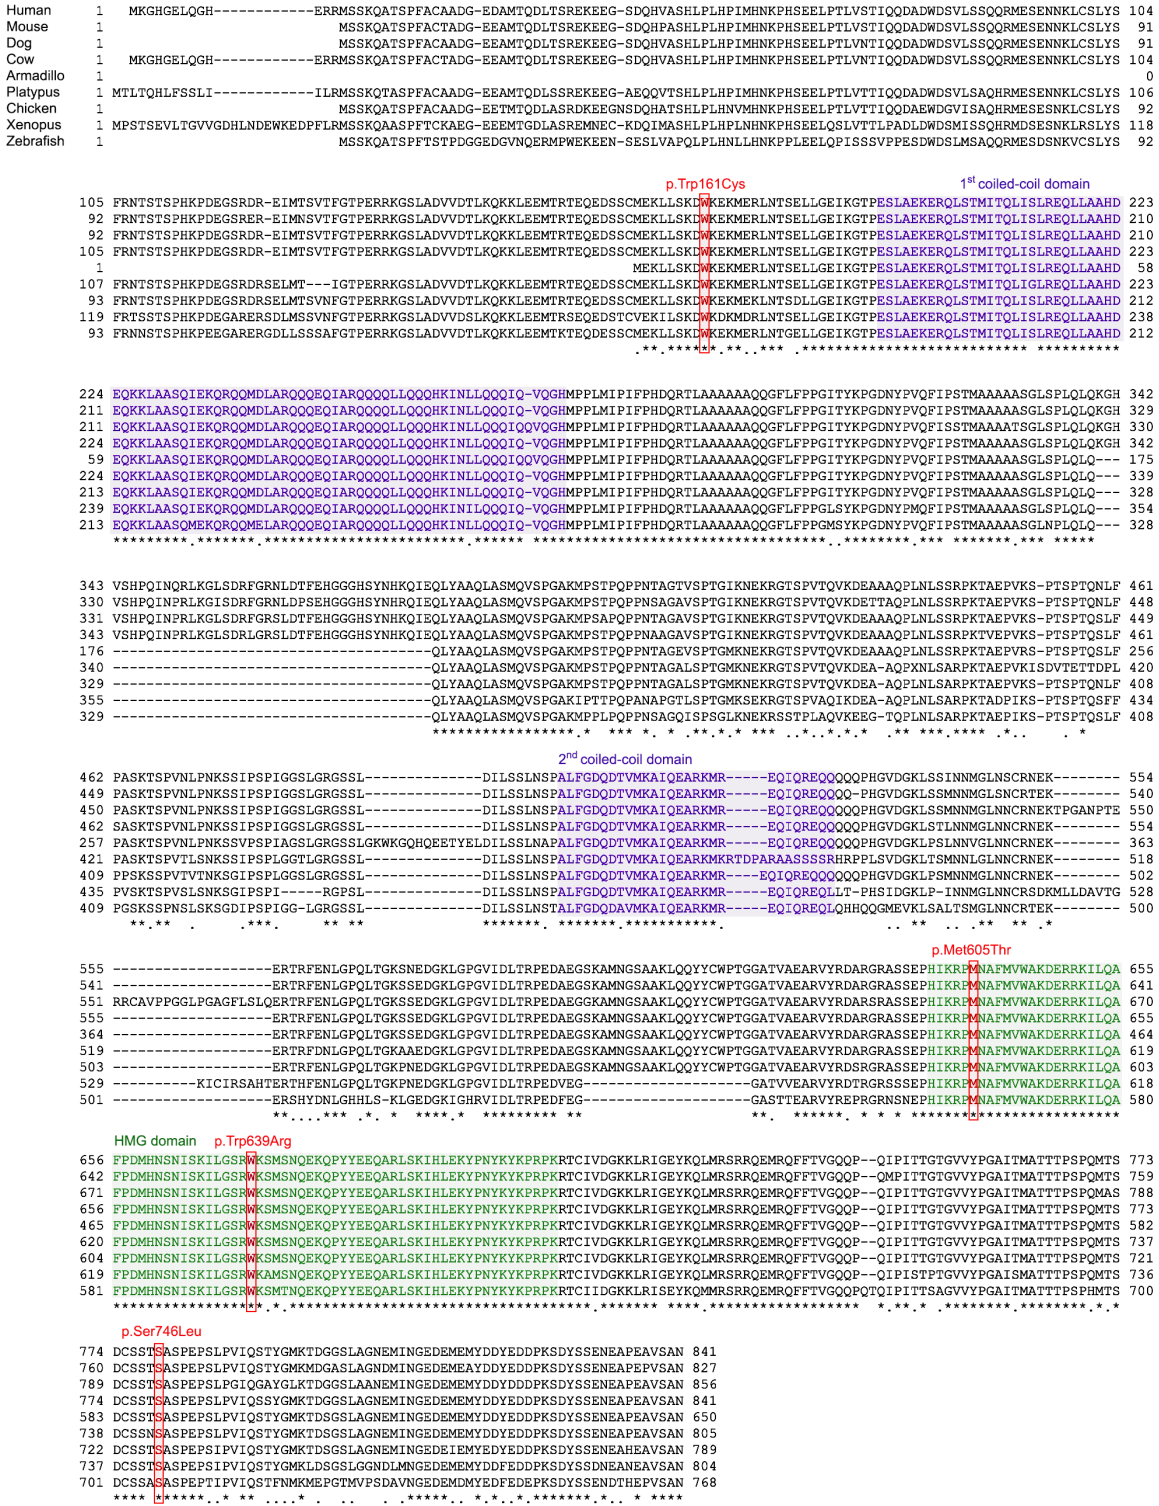

**Figure S1. ClustalW Alignment of SOX6 Vertebrate Orthologs.** The known function domains of SOX6 are colored and labeled. Fully conserved residues are marked with asterisks and semi-conserved residues with dots underneath the sequences. Residues altered in study subjects are indicated in red.

| Variant     | Amino acid structure                                                                                        | Swiss-Model                                                                                                       | PEP-FOLD3                                                                                                     |
|-------------|-------------------------------------------------------------------------------------------------------------|-------------------------------------------------------------------------------------------------------------------|---------------------------------------------------------------------------------------------------------------|
| p.Trp161Cys | 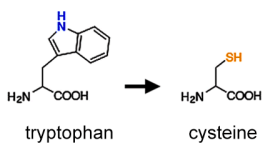<br>tryptophan → cysteine  | <br>Residues 153, 170, 175, 202 | <br>W161, C161, 136, 185   |
| p.Met605Thr | <br>methionine → threonine | <br>H1, H2, H3, N, C            |                                                                                                               |
| p.Trp639Arg | <br>tryptophan → arginine | <br>H1, H2, H3, N, C           | <br>W639, R639, 614, 661  |
| p.Ser746Leu | <br>serine → leucine     |                                                                                                                   | <br>S746, L746, 721, 770 |

**Figure S2. Prediction of Structural Changes Imposed by Missense Variants.** The first column identifies the missense variants detected in four study subjects. The second column shows schematics of wild-type and missense variant residues. The third column shows structural models proposed by Swiss-Model for the SOX6 regions containing three missense variants. For p.Met605Thr and p.Trp639Arg, the models correspond to the SOX5 HMG domain (with the  $\alpha$ -helices H1, H2, and H3 in blue, and flanking sequences in grey) wrapped around the DNA helix (backbone in brown and nucleotide pairs colored). Altered amino acids are circled in black and their side chains represented. The last column shows structural models predicted by PEP-FOLD3 for the wild-type and mutant SOX6 regions that encompass missense variants. The wild-type and variant residues are indicated, as are the boundaries of the sequences used for modeling.

## Genomics England Research Consortium

Ambrose J. C.<sup>1</sup>, Bleda M.<sup>1</sup> , Boardman-Pretty F.<sup>1,2</sup> , Boissiere J. M.<sup>1</sup>, Boustred C. R.<sup>1</sup>, Caulfield M. J.<sup>1,2</sup>, Chan G. C.<sup>1</sup>, Craig C. E. H.<sup>1</sup> , Daugherty L. C.<sup>1</sup> , de Burca A.<sup>1</sup>, Devereau, A.<sup>1</sup>, Elgar G.<sup>1,2</sup> , Foulger R. E.<sup>1</sup> , Fowler T.<sup>1</sup> , Furió-Tarí P.<sup>1</sup> , Hackett J. M.<sup>1</sup>, Halai D.<sup>1</sup>, Holman J. E.<sup>1</sup>, Hubbard T. J. P.<sup>1</sup> , Kasperaviciute D.<sup>1,2</sup>, Kayikci M.<sup>1</sup> , Lahnstein L.<sup>1</sup>, Lawson K.<sup>1</sup> , Leigh S. E. A.<sup>1</sup> , Leong I. U. S.<sup>1</sup> , Lopez F. J.<sup>1</sup>, Maleady-Crowe F.<sup>1</sup>, Mason J.<sup>1</sup> , McDonagh E. M.<sup>1,2</sup> , Moutsianas L.<sup>1,2</sup> , Mueller M.<sup>1,2</sup> , Need A. C.<sup>1,2</sup> , Odhams C. A.<sup>1</sup> , Patch C.<sup>1,2</sup> , Perez-Gil D.<sup>1</sup>, Polychronopoulos D.<sup>1</sup> , Pullinger J.<sup>1</sup> , Rahim T.<sup>1</sup> , Rendon A.<sup>1</sup> , Rogers T.<sup>1</sup>, Ryten M.<sup>1</sup>, Savage K.<sup>1</sup>, Scott R. H.<sup>1</sup>, Siddiq A.<sup>1</sup> , Sieghart A.<sup>1</sup> , Smedley D.<sup>1,2</sup>, Smith K. R.<sup>1,2</sup> , Sosinsky A.<sup>1,2</sup> , Spooner W.<sup>1</sup> , Stevens H. E.<sup>1</sup> , Stuckey A.<sup>1</sup> , Thomas E. R. A.<sup>1,2</sup> , Thompson S. R.<sup>1</sup> , Tregidgo C.<sup>1</sup>, Tucci A.<sup>1,2</sup> , Walsh E.<sup>1</sup> , Watters, S. A.<sup>1</sup> , Welland M. J.<sup>1</sup>, Williams E.<sup>1</sup> , Witkowska K.<sup>1,2</sup>, Wood S. M.<sup>1,2</sup>, Zarowiecki M.<sup>1</sup> .

1. Genomics England, London, UK

2. William Harvey Research Institute, Queen Mary University of London, London, EC1M 6BQ, UK.
